# Supplementary material
Source: publisher figshare collection journal article supplement (https://frontiersin.figshare.com/ndownloader/files/20213787)

# Characterizing chemoautotrophy and heterotrophy in marine archaea and bacteria with single-cell multi-isotope nanoSIP

Anne E. Dekas<sup>1,2</sup>, Alma Parada<sup>1,3</sup>, Xavier Mayali<sup>2</sup>, Jed A. Fuhrman<sup>3</sup>, Jessica Wollard<sup>2</sup>, Peter Weber<sup>2</sup>, Jennifer Pett-Ridge<sup>2</sup>

<sup>1</sup>*Department of Earth System Science, Stanford University, Stanford, CA 94305*

<sup>2</sup>*Physical and Life Sciences Directorate, Lawrence Livermore National Laboratory, Livermore, CA 94550*

<sup>3</sup>*Department of Biological Sciences, University of Southern California, Los Angeles, CA 90089*

## Supplementary Figures and Tables

### Tables

**Table S1.** SPOT Contextual Data. BDL indicates below detection limit. Detection limit for ammonium was 10 nM.

**Table S2.** Summary of experiments and analyses.

**Table S3.** Average Bray-Curtis Similarities between replicate mock communities and samples. The number of pairwise comparisons are given by n. All replicates include PCR replicates, different filter extractions of the same sample, and different elutions of the same extraction.

**Table S4.** Cell density over time in bottle incubations with SPOT seawater. Results for duplicate incubations are shown.

**Table S5.** Cell density over time in bottle incubations with Pacifica seawater.

### Figures

**Figure S1.** Sampling sites. (A) Map of the western United States indicating locations of Pacifica Pier (Pacifica) and the San Pedro Ocean Time Series (SPOT). (B) Pacifica Pier. (C) Niskin rosette at SPOT.

**Figure S2.** Maximum-likelihood 16S rRNA gene phylogenetic tree of the most abundant Thaumarchaeal (MGI) OTUs detected in either Pacifica or SPOT. Sequences from this study are shown in red. Shallow and Deep marine groups designated as in Swan et al (2014). Reference sequences are italicized and NCBI accession numbers are included in tip labels. Bootstrap values >50% are shown (1000 replicates).

**Figure S3.** Top 20 most abundant archaeal OTUs *in situ* and during incubation as assessed by 16S rRNA sequencing of seawater from (A) Pacifica and (B) SPOT. Data is rescaled from Figure 2 to better demonstrate the stability of the archaeal community composition. Each bar represents a single sample or biological replicate (technical replicates were averaged). Red text and bars

indicate incubations amended with bacterial antibiotics. Relative abundance out of total community. Colors are shared between sites. Asterisks indicate samples that were also analyzed via nanoSIMS.

**Figure S4.** OTU-level changes in community composition over time and between treatments. Relative abundance of the top 50 most abundant OTUs and NMDS ordination of the Bray-Curtis Dissimilarity of the microbial communities *in situ* and during incubation as assessed by 16S rRNA sequencing of seawater from (A,B) Pacifica and (C,D) SPOT are shown. Bray-Curtis Dissimilarity was calculated using all OTUs in a sample. The number adjacent to each symbol in the NMDS plots indicates the day that sample was taken.

**Figure S5.** Archaeal community composition *in situ* and during incubation as assessed by 16S rRNA sequencing separated by the three major archaeal groups detected: MGI Thaumarchaeota (A+D), MGII Euryarchaeota (B+E) and MGIII Euryarchaeota (C+F), at both Pacifica (A-C) and SPOT (D-F). Shown as relative abundance of archaeal OTUs. The top 20 most abundant OTUs are shown for MGI and MGII, and the top 10 for MGIII. Each color represents a unique OTU.

**Table S1.** SPOT Contextual Data. BDL indicates below detection limit. Detection limit for ammonium was 10 nM.

| Measurement Description               | Value   | Units        | Reference         | Method                                                                 |
|---------------------------------------|---------|--------------|-------------------|------------------------------------------------------------------------|
| Depth of chlorophyll fluorescence max | 45      | m            | Parada et al 2017 | CTD measurement                                                        |
| Ammonium concentration                | BDL     | μM           | This Study        | Standard fluorometric method, Holmes et al. (1999)                     |
| Nitrite concentration                 | BDL     | μM           | Parada et al 2017 | Standard colorimetric measurement, Parsons et al. (1984)               |
| Nitrate concentration                 | 18.485  | μM           | Parada et al 2017 | Standard colorimetric measurement, Parsons et al. (1984)               |
| Oxygen concentration                  | 3.1142  | ml/l         | Parada et al 2017 | CTD measurement                                                        |
| Phosphate concentration               | 1.48    | mM           | Parada et al 2017 | Standard colorimetric measurement, Parsons et al. (1984)               |
| Salinity                              | 33.7329 | PSU          | Parada et al 2017 | CTD measurement                                                        |
| Temperature                           | 9.4716  | °C           | Parada et al 2017 | CTD measurement                                                        |
| Bacterial productivity                | 9779.43 | cells/ml/day | Parada et al 2017 | Leucine incorporation, Fuhrman et al. (2006)                           |
| Cell turnover                         | 38.1    | Day          | Parada et al 2017 | Cell abundance divided by leucine incorporation, Fuhrman et al. (2006) |

**Table S2. Summary of experiments and analyses.**

|          |    | Incubation Amendments |                  |                  |                                        |              | Analyses  |             |          |                    |          |
|----------|----|-----------------------|------------------|------------------|----------------------------------------|--------------|-----------|-------------|----------|--------------------|----------|
|          |    | Incubation            | <sup>13</sup> C- | <sup>15</sup> N- | <sup>13</sup> C- <sup>15</sup> N-Amino |              |           |             |          |                    |          |
|          |    | Time                  | bicarbonate      | Amino Acids      | Acids (nM                              | Streptomycin | Ampicilin | Cell        | 16S rRNA | High-Throughput    |          |
|          |    | (Days)                | (% final)        | (nM added)       | added)                                 | (mg/ml)      | (mg/ml)   | enumeration | survey   | NanoSIMS Metabolic | FISH-    |
|          |    | Name                  |                  |                  |                                        |              |           |             |          | Screening          | NanoSIMS |
| SPOT     | -- | 0                     |                  |                  |                                        |              |           | Y           | Y        | Y                  |          |
|          | A6 | 2                     | 13               | 50               |                                        |              |           | Y           | Y        | Y                  | Y        |
|          | A1 | 2                     | 13               | 50               |                                        |              |           | Y           | Y        |                    |          |
|          | B2 | 7                     | 13               | 50               |                                        |              |           | Y           | Y        | Y                  |          |
|          | A3 | 7                     | 13               | 50               |                                        |              |           | Y           | Y        |                    |          |
|          | A7 | 7                     | 13               | 50               |                                        | 0.05         | 0.05      | Y           | Y        |                    |          |
|          | A8 | 7                     | 13               | 50               |                                        | 0.05         | 0.05      | Y           | Y        | Y                  |          |
| Pacifica | D1 | 3                     |                  |                  |                                        |              |           | Y           | Y        | Y                  |          |
|          | D4 | 3                     | 7.5              | 100              |                                        |              |           | Y           | Y        |                    | Y        |
|          | D6 | 6                     | 7.5              | 100              |                                        |              |           | Y           | Y        | Y                  | Y        |
|          | D9 | 6                     | 7.5              | 100              |                                        | 0.05         | 0.05      | Y           | Y        |                    |          |
|          | D8 | 6                     |                  |                  | 104                                    |              |           | Y           | Y        | Y                  | Y        |

**Table S3.** Average Bray-Curtis Similarities between replicate mock communities and samples. The number of pairwise comparisons are given by n. All replicates include PCR replicates, different filter extractions of the same sample, and different elutions of the same extraction.

|                                     | Bray Curtis Similarity<br>Mean $\pm$ SE (n) |
|-------------------------------------|---------------------------------------------|
| Even Mock Communities               | 90.9 $\pm$ 0.260 (190)                      |
| Staggered Mock Communities          | 90.4 $\pm$ 0.245 (210)                      |
| Pacifica and SPOT<br>PCR Replicates | 74.1 $\pm$ 4.9 (6)                          |
| Pacifica and SPOT<br>All Replicates | 73.6 $\pm$ 0.85 (30)                        |

**Table S4.** Cell density over time in bottle incubations with SPOT water. Results for duplicate incubations are shown.

| Chemical Amendments       |                  |    |                  |                                                           |      |                  |                  |                  |                  |                                                                            |                  |                  |      |                  |  |
|---------------------------|------------------|----|------------------|-----------------------------------------------------------|------|------------------|------------------|------------------|------------------|----------------------------------------------------------------------------|------------------|------------------|------|------------------|--|
| Incubation<br>Time (days) | Unamended        |    |                  | <sup>13</sup> C-bicarbonate + <sup>15</sup> N-Amino Acids |      |                  |                  |                  |                  | <sup>13</sup> C-bicarbonate + <sup>15</sup> N-Amino Acids<br>+ Antibiotics |                  |                  |      |                  |  |
|                           | cells/ml         |    |                  | cells/ml                                                  |      |                  | cells/ml         | SD               | cells/ml         |                                                                            |                  | cells/ml         |      |                  |  |
|                           | x10 <sup>5</sup> | SD | x10 <sup>5</sup> | x10 <sup>5</sup>                                          | SD   | x10 <sup>5</sup> | x10 <sup>5</sup> | x10 <sup>5</sup> | x10 <sup>5</sup> | SD                                                                         | x10 <sup>5</sup> | x10 <sup>5</sup> | SD   | x10 <sup>5</sup> |  |
|                           |                  |    |                  |                                                           |      |                  |                  |                  |                  |                                                                            |                  |                  |      |                  |  |
| 0                         | 5.80             |    | 1.01             |                                                           |      |                  |                  |                  |                  |                                                                            |                  |                  |      |                  |  |
| 2                         |                  |    |                  | 2.98                                                      | 0.43 |                  | 2.62             | 0.30             |                  |                                                                            |                  |                  |      |                  |  |
| 7                         |                  |    |                  | 4.79                                                      | 0.53 |                  | 5.29             | 0.64             |                  | 4.81                                                                       | 0.72             |                  | 3.74 | 0.52             |  |

**Table S5.** Cell density over time in bottle incubations with Pacifica water.

| Incubation<br>Time (days) | Chemical Amendments |      |                  |                                              |      |                  |                                                               |      |                                      |      |                  |                                                       |      |                  |
|---------------------------|---------------------|------|------------------|----------------------------------------------|------|------------------|---------------------------------------------------------------|------|--------------------------------------|------|------------------|-------------------------------------------------------|------|------------------|
|                           | Unamended           |      |                  | <sup>13</sup> C-bicarb + <sup>15</sup> N-AAs |      |                  | <sup>13</sup> C-bicarb + <sup>15</sup> N-AAs<br>+ Antibiotics |      | <sup>13</sup> C- <sup>15</sup> N-AAs |      |                  | <sup>13</sup> C- <sup>15</sup> N-AAs<br>+ Antibiotics |      |                  |
|                           | cells/ml            |      |                  | cells/ml                                     |      |                  | cells/ml                                                      |      | cells/ml                             |      |                  | cells/ml                                              |      |                  |
|                           | SD                  |      |                  | SD                                           |      |                  | SD                                                            |      | SD                                   |      |                  | SD                                                    |      |                  |
|                           | x10 <sup>6</sup>    | SD   | x10 <sup>6</sup> | x10 <sup>6</sup>                             | SD   | x10 <sup>6</sup> | x10 <sup>6</sup>                                              | SD   | x10 <sup>6</sup>                     | SD   | x10 <sup>6</sup> | x10 <sup>6</sup>                                      | SD   | x10 <sup>6</sup> |
| 0                         | 3.84                | 0.72 |                  |                                              |      |                  |                                                               |      |                                      |      |                  |                                                       |      |                  |
| 3                         | 5.57                | 1.41 |                  | 4.58                                         | 1.69 |                  | 2.44                                                          | 0.43 |                                      |      |                  |                                                       |      |                  |
| 6                         |                     |      |                  | 2.44                                         | 0.64 |                  | 1.12                                                          | 0.29 |                                      | 2.37 | 0.24             |                                                       | 1.75 | 0.48             |

**Figure S1.** Sampling sites. (A) Map of the western United States indicating locations of Pacifica Pier (PP) and the San Pedro Ocean Time Series (SPOT). (B) Pacifica Pier. (C) Niskin rosette at SPOT.

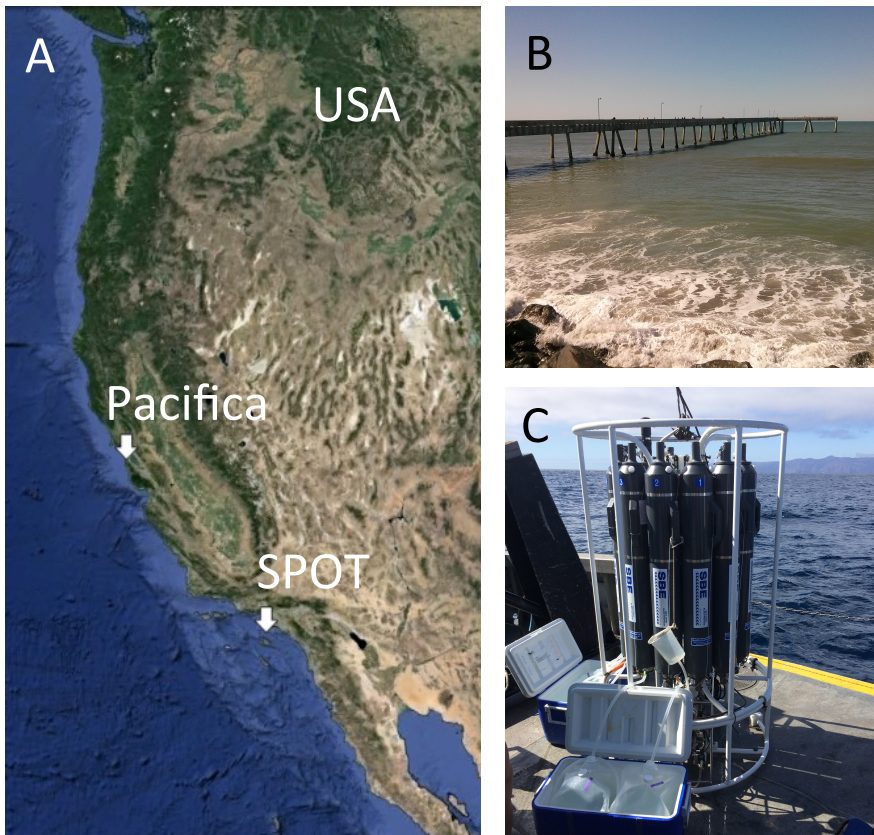

**Figure S2.** Maximum-likelihood 16S rRNA gene phylogenetic tree of the most abundant Thaumarchaeal (MGI) OTUs detected in either Pacifica or SPOT. Sequences from this study are shown in red. Shallow and Deep marine groups designated as in Swan et al (2014). Reference sequences are italicized and NCBI accession numbers are included in tip labels. Bootstrap values >50% are shown (1000 replicates).

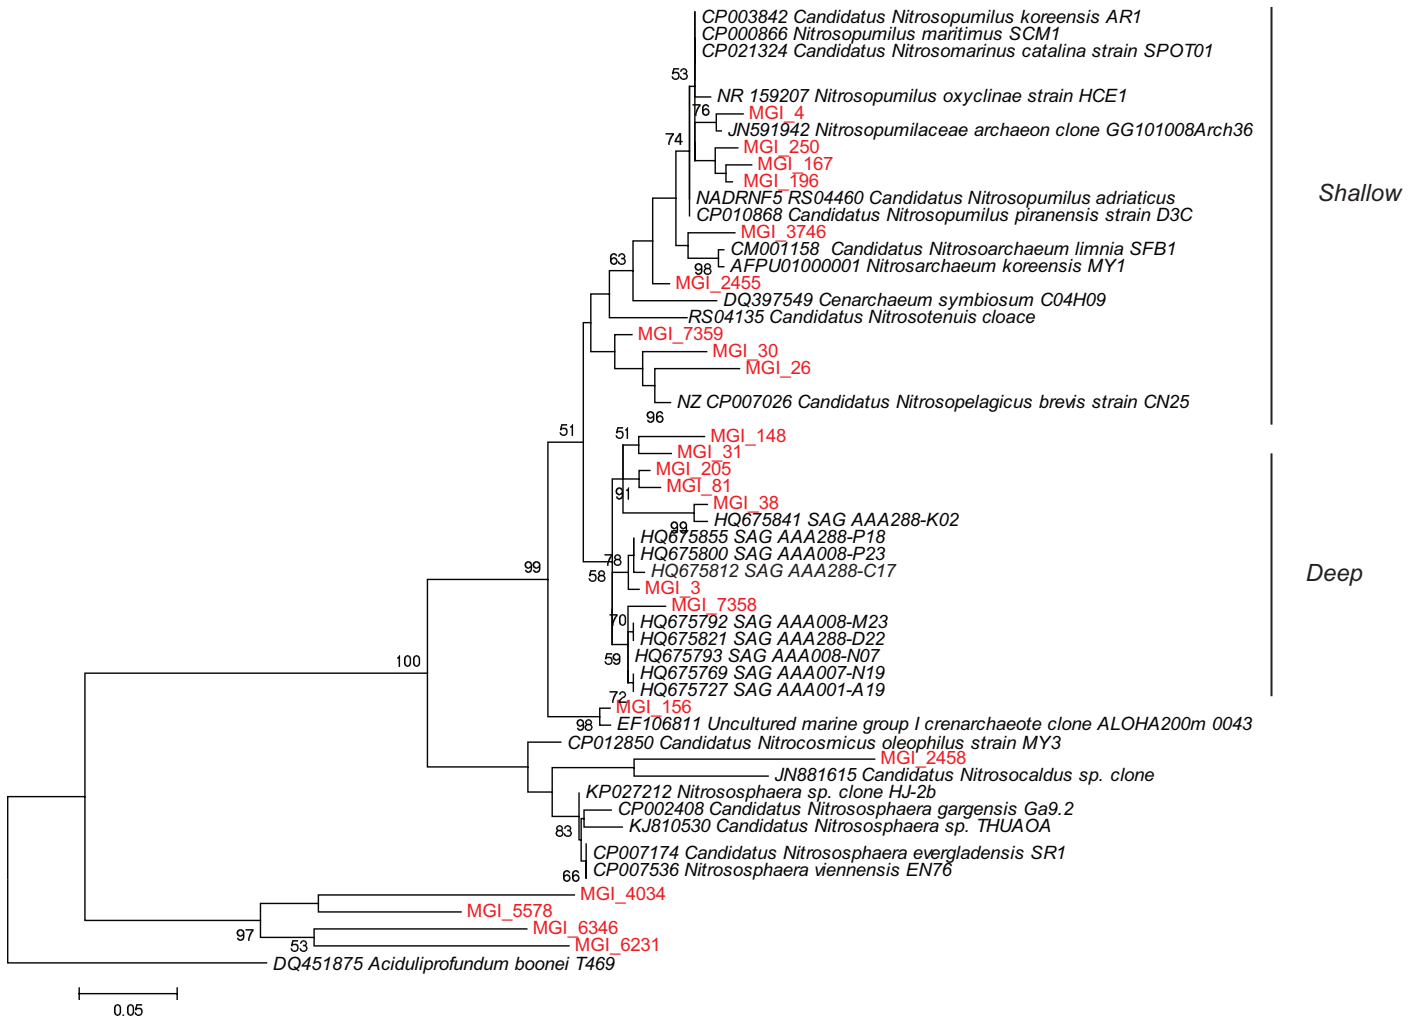



**Figure S3.** Top 20 most abundant archaeal OTUs *in situ* and during incubation as assessed by 16S rRNA sequencing of seawater from (A) Pacifica and (B) SPOT. Data is rescaled from Figure 2 to better demonstrate the stability of the archaeal community composition. Each bar represents a single sample or biological replicate (technical replicates were averaged). Red text and bars indicate incubations amended with bacterial antibiotics. Relative abundance out of total community. Colors are shared between sites. Asterisks indicate samples that were also analyzed via nanoSIMS.

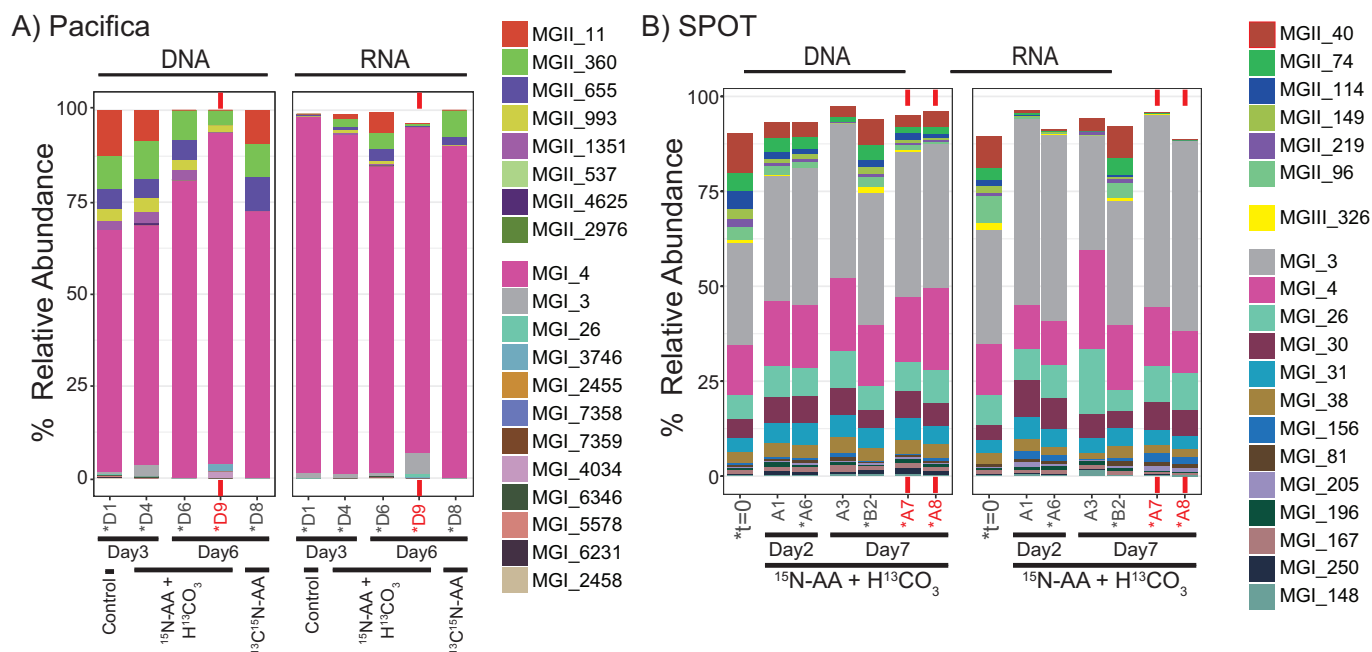

**Figure S4.** OTU-level changes in community composition over time and between treatments. Relative abundance of the top 50 most abundant OTUs and NMDS ordination of the Bray-Curtis Dissimilarity of the microbial communities *in situ* and during incubation as assessed by 16S rRNA sequencing of seawater from (A,B) Pacifica and (C,D) SPOT are shown. Bray-Curtis Dissimilarity was calculated using all OTUs in a sample. The number adjacent to each symbol in the NMDS plots indicates the day that sample was taken.

A) Relative Abundance of Top 50 Pacifica OTUs

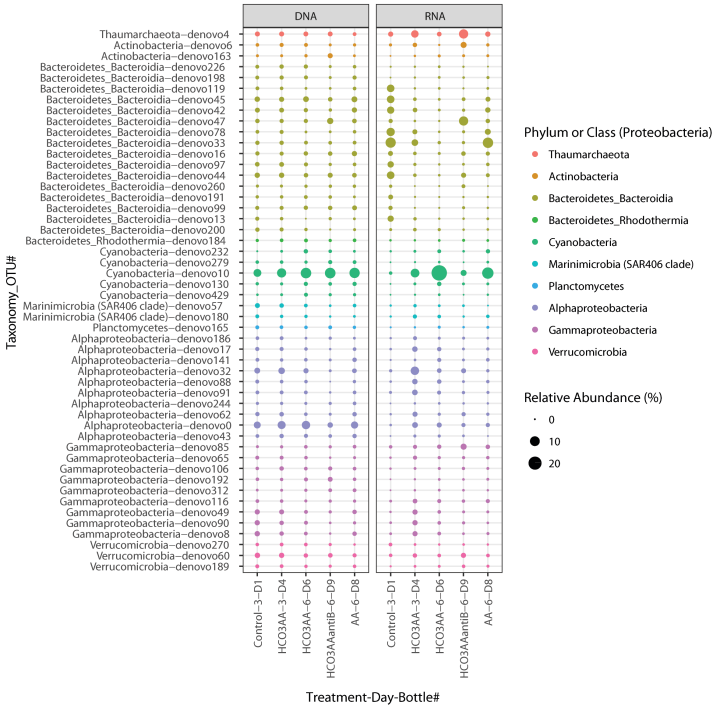

C) Relative Abundance of Top 50 SPOT OTUs

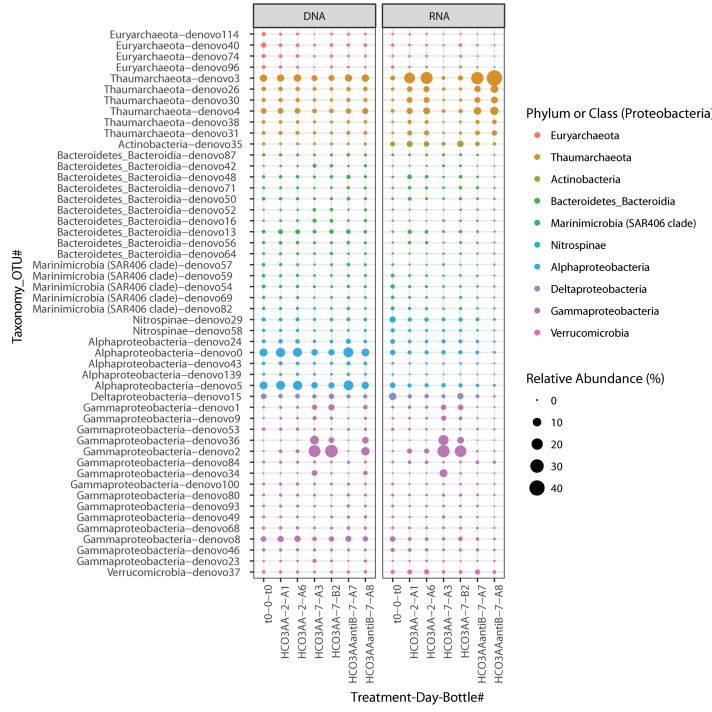

B) NMDS of Pacifica Communities

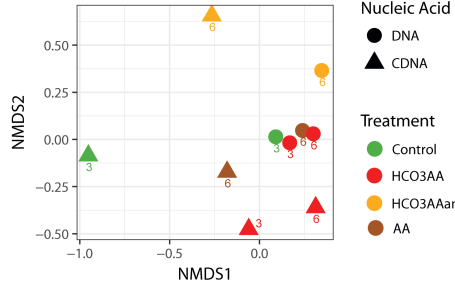

D) NMDS of SPOT Communities

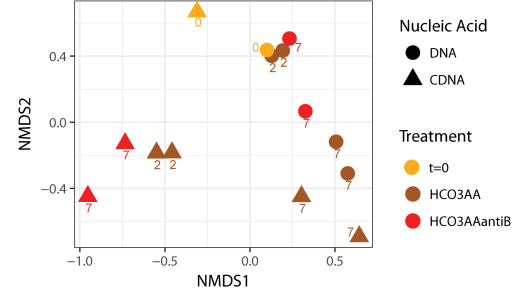

**Figure S5.** Archaeal community composition *in situ* and during incubation as assessed by 16S rRNA sequencing separated by the three major archaeal groups detected: MGI Thaumarchaeota (A+D), MGII Euryarchaeota (B+E) and MGIII Euryarchaeota (C+F), at both Pacifica (A-C) and SPOT (D-F). Shown as relative abundance of archaeal OTUs. The top 20 most abundant OTUs are shown for MGI and MGII, and the top 10 for MGIII. Each color represents a unique OTU.

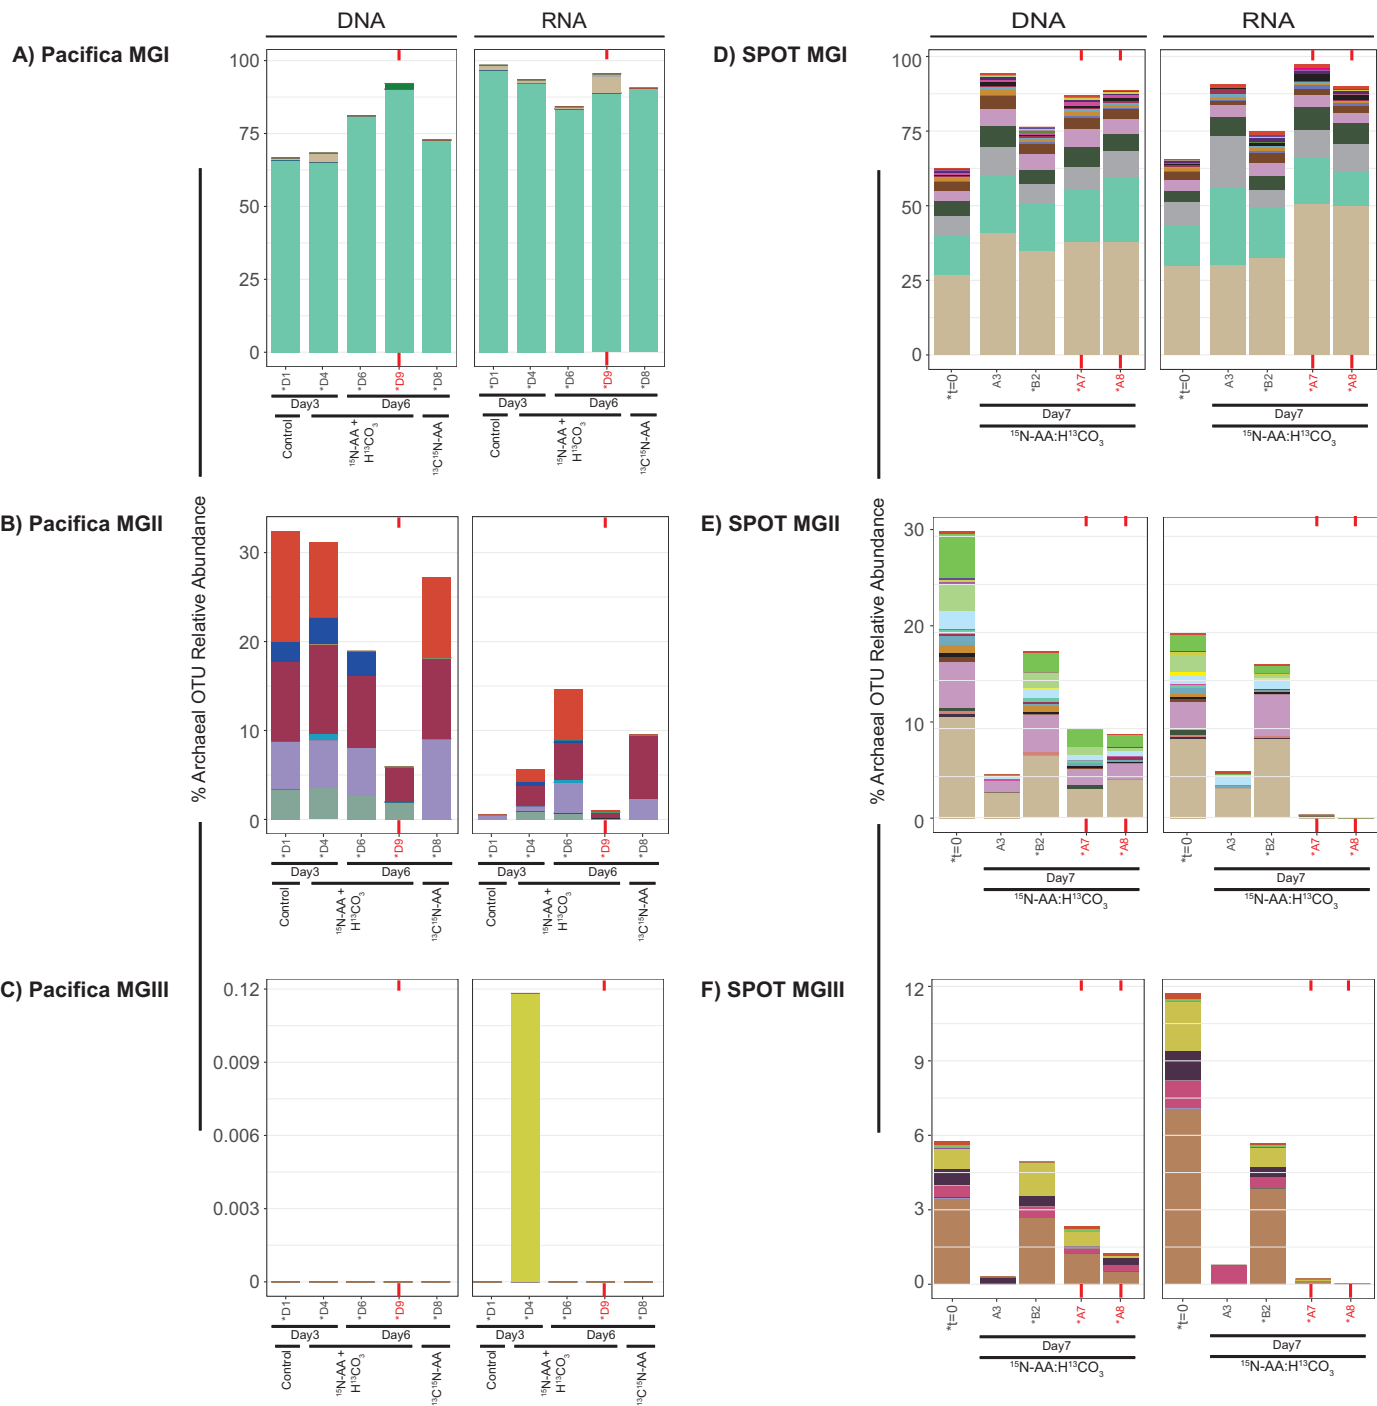

Supplement: Supplementary file [file 20213787]
